# Supplementary material for: Consumption of Herbal Supplements or Homeopathic Remedies to Prevent COVID-19 and Intention of Vaccination for COVID-19 in Latin America and the Caribbean
Source: MDPI journal article supplement (doi:10.3390/tropicalmed7060095), 2022-06-08
Supplement: s1 [file s1]

## Supplementary material

**Table S1. Sensitivity analysis for missing data according to use of herbal supplements in the study sample.**

| Variables                    | Use of Herbal Supplements |           |                          |           |
|------------------------------|---------------------------|-----------|--------------------------|-----------|
|                              | Missings                  |           | No missings              |           |
|                              | Weighted proportion<br>%  | 95%CI     | Weighted proportion<br>% | 95%CI     |
| <b>Vaccination intention</b> |                           |           |                          |           |
| Yes                          | 87.7                      | 87.2-88.1 | 12.3                     | 11.9-12.8 |
| No                           | 87.3                      | 86.8-87.8 | 12.7                     | 12.2-13.2 |
| <b>Gender</b>                |                           |           |                          |           |
| Female                       | 87.7                      | 87.3-88.0 | 12.3                     | 12.0-12.7 |
| Male                         | 87.6                      | 87.5-87.8 | 12.4                     | 12.2-12.5 |
| Not binary                   | 90.5                      | 88.6-92.2 | 9.5                      | 7.8-11.4  |
| <b>Age (years)</b>           |                           |           |                          |           |
| 18-30                        | 87.8                      | 87.2-88.4 | 12.2                     | 11.6-12.8 |
| 31-40                        | 87.6                      | 87.3-87.8 | 12.4                     | 12.2-12.7 |
| 41-50                        | 87.4                      | 87.1-87.7 | 12.6                     | 12.3-12.9 |
| 51-60                        | 87.7                      | 87.6-87.8 | 12.3                     | 12.2-12.4 |
| 61-70                        | 87.3                      | 86.8-87.8 | 12.7                     | 12.1-13.2 |
| 71-80                        | 88.8                      | 85.8-91.1 | 11.2                     | 8.9-14.2  |
| 80 or more                   | 88.8                      | 86.7-90.6 | 11.2                     | 9.3-13.3  |
| <b>Education level</b>       |                           |           |                          |           |
| Less than primary school     | 87.9                      | 87.5-88.2 | 12.1                     | 11.7-12.5 |
| Primary school               | 87.8                      | 87.3-88.3 | 12.2                     | 11.7-12.7 |
| Secondary school             | 87.8                      | 87.5-88.0 | 12.2                     | 12.0-12.5 |
| College / University         | 87.5                      | 87.4-87.7 | 12.5                     | 12.3-12.6 |
| Graduate school              | 87.2                      | 86.8-87.5 | 12.8                     | 12.5-13.2 |
| <b>Living area</b>           |                           |           |                          |           |
| City                         | 87.6                      | 87.4-87.8 | 12.4                     | 12.2-12.6 |
| Town                         | 88.0                      | 87.6-88.4 | 12.0                     | 11.6-12.4 |
| Village or rural area        | 87.9                      | 87.6-88.2 | 12.1                     | 11.8-12.4 |
| <b>Health condition</b>      |                           |           |                          |           |
| Poor                         | 87.5                      | 86.5-88.5 | 12.5                     | 11.5-13.5 |
| Fair                         | 87.5                      | 87.2-87.8 | 12.5                     | 12.2-12.8 |
| Good                         | 87.5                      | 87.2-87.8 | 12.5                     | 12.2-12.8 |
| Very good                    | 87.8                      | 87.3-88.2 | 12.2                     | 11.8-12.7 |
| Excellent                    | 87.8                      | 87.5-88.2 | 12.2                     | 11.8-12.5 |

95%CI: 95% Confidence Interval.

Weights and the design effect of the complex survey sampling were included.

**Table S2. Sensitivity analysis for missing data according to the use of homeopathic remedies in the study sample.**

| Variables                    | Use of homeopathic remedies |           |                          |           |
|------------------------------|-----------------------------|-----------|--------------------------|-----------|
|                              | Missings                    |           | No missings              |           |
|                              | Weighted proportion<br>%    | 95%CI     | Weighted proportion<br>% | 95%CI     |
| <b>Vaccination intention</b> |                             |           |                          |           |
| Yes                          | 87.4                        | 87.2-87.6 | 12.6                     | 12.4-12.8 |
| No                           | 87.5                        | 87.3-87.6 | 12.5                     | 12.4-12.7 |
| <b>Gender</b>                |                             |           |                          |           |
| Female                       | 87.6                        | 87.5-87.7 | 12.4                     | 12.3-12.5 |
| Male                         | 87.4                        | 87.2-87.6 | 12.6                     | 12.3-12.8 |
| Not binary                   | 77.5                        | 56.0-90.3 | 22.5                     | 9.7-44.0  |
| <b>Age (years)</b>           |                             |           |                          |           |
| 18-30                        | 87.7                        | 87.4-88.0 | 12.3                     | 11.9-12.6 |
| 31-40                        | 87.6                        | 86.9-88.2 | 12.4                     | 11.8-13.1 |
| 41-50                        | 87.7                        | 87.5-87.9 | 12.3                     | 12.1-12.5 |
| 51-60                        | 87.1                        | 86.4-87.9 | 12.9                     | 12.1-13.6 |
| 61-70                        | 87.0                        | 86.3-87.5 | 13.0                     | 12.4-13.7 |
| 71-80                        | 87.3                        | 87.0-87.7 | 12.7                     | 12.3-13.0 |
| 80 or more                   | 82.6                        | 76.1-87.7 | 17.4                     | 12.3-23.9 |
| <b>Education level</b>       |                             |           |                          |           |
| Less than primary school     | 88.1                        | 87.2-88.9 | 11.9                     | 11.0-12.8 |
| Primary school               | 87.9                        | 87.6-88.1 | 12.1                     | 11.8-12.4 |
| Secondary school             | 87.7                        | 87.5-87.8 | 12.3                     | 12.2-12.5 |
| College / University         | 87.4                        | 87.1-87.6 | 12.6                     | 12.4-12.9 |
| Graduate school              | 86.4                        | 85.3-87.5 | 13.6                     | 12.5-14.7 |
| <b>Living area</b>           |                             |           |                          |           |
| City                         | 87.4                        | 87.3-87.6 | 12.6                     | 12.4-12.7 |
| Town                         | 87.5                        | 87.1-88.0 | 12.5                     | 12.0-12.9 |
| Village or rural area        | 87.9                        | 86.8-88.8 | 12.1                     | 11.2-13.2 |
| <b>Health condition</b>      |                             |           |                          |           |
| Poor                         | 88.8                        | 88.4-89.1 | 11.2                     | 10.9-11.6 |
| Fair                         | 87.7                        | 87.3-88.0 | 12.3                     | 12.0-12.7 |
| Good                         | 87.2                        | 86.8-87.7 | 12.8                     | 12.3-13.2 |
| Very good                    | 87.1                        | 86.8-87.5 | 12.9                     | 12.5-13.2 |
| Excellent                    | 88.1                        | 87.7-88.5 | 11.9                     | 11.5-12.3 |

95%CI: 95% Confidence Interval.

Weights and the design effect of the complex survey sampling were included.

**Table S3. Sensitivity analysis for missing data according to eating garlic, ginger or lemon in the study sample.**

| Variables                    | Eating garlic, ginger, or lemon |           |                          |           |
|------------------------------|---------------------------------|-----------|--------------------------|-----------|
|                              | Missings                        |           | No missings              |           |
|                              | Weighted proportion<br>%        | 95%CI     | Weighted proportion<br>% | 95%CI     |
| <b>Vaccination intention</b> |                                 |           |                          |           |
| Yes                          | 87.7                            | 87.3-88.0 | 12.3                     | 12.0-12.7 |
| No                           | 87.8                            | 87.2-88.4 | 12.2                     | 11.6-12.8 |
| <b>Gender</b>                |                                 |           |                          |           |
| Female                       | 87.7                            | 87.3-88.0 | 12.3                     | 12.0-12.6 |
| Male                         | 87.6                            | 87.5-87.8 | 12.4                     | 12.2-12.5 |
| Not binary                   | 91.1                            | 90.0-92.0 | 8.9                      | 8.0-10.0  |
| <b>Age (years)</b>           |                                 |           |                          |           |
| 18-30                        | 88.1                            | 87.7-88.5 | 11.9                     | 11.5-12.3 |
| 31-40                        | 87.3                            | 87.1-87.5 | 12.7                     | 12.5-12.9 |
| 41-50                        | 87.3                            | 87.2-87.5 | 12.7                     | 12.5-12.8 |
| 51-60                        | 87.5                            | 87.3-87.7 | 12.5                     | 12.3-12.7 |
| 61-70                        | 87.7                            | 87.5-88.0 | 12.3                     | 12.0-12.5 |
| 71-80                        | 88.6                            | 87.6-89.5 | 11.4                     | 10.5-12.4 |
| 80 or more                   | 87.9                            | 84.7-90.5 | 12.1                     | 9.5-15.3  |
| <b>Education level</b>       |                                 |           |                          |           |
| Less than primary school     | 89.1                            | 89.0-89.2 | 10.9                     | 10.8-11.0 |
| Primary school               | 88.6                            | 88.3-88.9 | 11.4                     | 11.1-11.7 |
| Secondary school             | 87.7                            | 87.4-87.9 | 12.3                     | 12.0-12.6 |
| College / University         | 87.4                            | 87.3-87.6 | 12.6                     | 12.4-12.7 |
| Graduate school              | 86.9                            | 86.1-87.7 | 13.1                     | 12.3-13.9 |
| <b>Living area</b>           |                                 |           |                          |           |
| City                         | 87.6                            | 87.3-87.9 | 12.4                     | 12.1-12.7 |
| Town                         | 87.8                            | 87.3-88.2 | 12.2                     | 11.7-12.7 |
| Village or rural area        | 88.2                            | 87.3-89.0 | 11.8                     | 11.0-12.7 |
| <b>Health condition</b>      |                                 |           |                          |           |
| Poor                         | 88.3                            | 87.7-88.8 | 11.7                     | 11.2-12.3 |
| Fair                         | 87.8                            | 87.4-88.2 | 12.2                     | 11.8-12.6 |
| Good                         | 87.7                            | 87.5-87.9 | 12.3                     | 12.1-12.5 |
| Very good                    | 87.3                            | 87.1-87.6 | 12.7                     | 12.4-12.9 |
| Excellent                    | 87.9                            | 87.2-88.5 | 12.1                     | 11.5-12.8 |

95%CI: 95% Confidence Interval.

Weights and the design effect of the complex survey sampling were included.

**Table S4. Proportion of use of herbal supplements to prevent COVID-19 infection in the Latin America and Caribbean region.**

| Countries         | Use of Herbal Supplements |                     |           |                     |           |
|-------------------|---------------------------|---------------------|-----------|---------------------|-----------|
|                   | N                         | Yes                 |           | No                  |           |
|                   |                           | Weighted proportion |           | Weighted proportion |           |
|                   |                           | %                   | 95%CI     | %                   | 95%CI     |
| Argentina         | 7811                      | 2.6                 | 2.2-3.0   | 97.4                | 97.0-97.8 |
| Bolivia           | 548                       | 19.6                | 15.7-24.2 | 80.4                | 75.8-84.2 |
| Brazil            | 7503                      | 7.9                 | 7.2-8.8   | 92.1                | 91.2-92.8 |
| Chile             | 560                       | 5.6                 | 3.7-8.2   | 94.4                | 91.8-96.2 |
| Colombia          | 7500                      | 10.0                | 9.2-11.0  | 90.0                | 89.0-90.8 |
| Ecuador           | 595                       | 15.4                | 11.9-19.6 | 84.6                | 80.3-88.1 |
| Guatemala         | 610                       | 9.7                 | 7.1-13.2  | 90.3                | 86.8-92.9 |
| Honduras          | 633                       | 15.0                | 11.6-19.2 | 85.0                | 80.8-88.4 |
| Jamaica           | 445                       | 17.3                | 13.5-21.8 | 82.7                | 78.2-86.5 |
| Mexico            | 7535                      | 6.5                 | 5.8-7.4   | 93.5                | 92.6-94.2 |
| Peru              | 579                       | 14.1                | 10.1-19.4 | 85.9                | 80.6-90.0 |
| Trinidad & Tobago | 585                       | 19.5                | 16.2-23.3 | 80.5                | 76.7-83.8 |
| Uruguay           | 651                       | 2.0                 | 1.0-3.8   | 98.0                | 96.2-99.0 |
| Venezuela         | 663                       | 18.8                | 15.4-22.6 | 81.2                | 77.4-84.5 |

95%CI: 95% Confidence Interval.

Weights and the design effect of the complex survey sampling were included.

**Table S5. Proportion of use of homeopathic remedies to prevent COVID-19 infection in the Latin America and Caribbean region.**

| Countries         |      | Use of Homeopathic Remedies |           |                     |           |
|-------------------|------|-----------------------------|-----------|---------------------|-----------|
|                   |      | Yes                         |           | No                  |           |
|                   |      | Weighted proportion         |           | Weighted proportion |           |
|                   | N    | %                           | 95%CI     | %                   | 95%CI     |
| Argentina         | 7768 | 3.5                         | 3.0-4.1   | 96.5                | 95.9-97.0 |
| Bolivia           | 580  | 14.6                        | 10.6-19.8 | 85.4                | 80.2-89.4 |
| Brazil            | 7583 | 4.2                         | 3.7-4.9   | 95.8                | 95.1-96.3 |
| Chile             | 584  | 4.7                         | 3.1-7.0   | 95.3                | 93.0-96.9 |
| Colombia          | 7718 | 7.4                         | 6.7-8.2   | 92.6                | 91.8-93.3 |
| Ecuador           | 610  | 10.9                        | 7.9-15.0  | 89.1                | 85.0-92.1 |
| Guatemala         | 644  | 9.8                         | 6.4-14.6  | 90.2                | 85.4-93.5 |
| Honduras          | 582  | 12.1                        | 8.9-16.1  | 87.9                | 83.9-91.1 |
| Jamaica           | 433  | 12.0                        | 8.9-15.9  | 88.0                | 84.1-91.1 |
| Mexico            | 7447 | 5.7                         | 5.0-6.4   | 94.3                | 93.6-95.0 |
| Peru              | 585  | 4.6                         | 2.8-7.6   | 95.4                | 92.4-97.2 |
| Trinidad & Tobago | 594  | 21.5                        | 12.5-34.2 | 78.5                | 65.8-87.5 |
| Uruguay           | 624  | 1.8                         | 1.0-3.3   | 98.2                | 96.7-99.0 |
| Venezuela         | 700  | 11.4                        | 8.8-14.7  | 88.6                | 85.3-91.2 |

95%CI: 95% Confidence Interval.

Weights and the design effect of the complex survey sampling were included.

**Table S6. Proportion of eating garlic, ginger, and lemon to prevent COVID-19 infection in the Latin America and Caribbean region.**

| Countries         | Eating garlic, ginger, or lemon |                     |           |                     |           |
|-------------------|---------------------------------|---------------------|-----------|---------------------|-----------|
|                   | Yes                             |                     |           | No                  |           |
|                   |                                 | Weighted proportion |           | Weighted proportion |           |
|                   | N                               | %                   | 95%CI     | %                   | 95%CI     |
| Argentina         | 7770                            | 7.2                 | 6.5-7.9   | 92.8                | 92.1-93.5 |
| Bolivia           | 559                             | 34.1                | 29.5-39.1 | 65.9                | 60.9-70.5 |
| Brazil            | 7551                            | 9.0                 | 8.2-9.9   | 91.0                | 90.1-91.8 |
| Chile             | 619                             | 11.0                | 8.4-14.2  | 89.0                | 85.8-91.6 |
| Colombia          | 7608                            | 21.7                | 20.5-23.0 | 78.3                | 77.0-79.5 |
| Ecuador           | 570                             | 39.0                | 33.6-44.7 | 61.0                | 55.3-66.3 |
| Guatemala         | 609                             | 28.8                | 23.7-34.4 | 71.2                | 65.6-76.3 |
| Honduras          | 605                             | 28.9                | 24.6-33.7 | 71.1                | 66.3-75.4 |
| Jamaica           | 420                             | 22.5                | 17.8-28.0 | 77.5                | 72.0-82.2 |
| Mexico            | 7611                            | 15.3                | 14.1-16.6 | 84.7                | 83.4-85.9 |
| Peru              | 560                             | 28.3                | 23.6-33.5 | 71.7                | 66.5-76.3 |
| Trinidad & Tobago | 634                             | 22.8                | 19.3-26.8 | 77.2                | 73.2-80.7 |
| Uruguay           | 638                             | 9.9                 | 7.3-13.4  | 90.1                | 86.6-92.7 |
| Venezuela         | 662                             | 29.3                | 25.3-33.7 | 70.7                | 66.2-74.7 |

95%CI: 95% Confidence Interval.

Weights and the design effect of the complex survey sampling were included.
